# Supplementary material for: Experimental investigation of the interplay between ruminative thinking and working memory capacity: Accounting for modality, affect and metacognition
Source: Research Square preprint supplement (doi:10.21203/rs.3.rs-6558445/v1), 2025-05-08
Supplement: Supplementary file 1 [file 0710594e8c04d3d0838b06aa.pdf]

## Supplementary Materials

**Table S1.** Pearson's correlations between the baseline measures and cognitive task performance (all groups included, n = 61)

|             | Age          | MADRS        | RRS          | ARS          | T1rum        | T1arousal   | T1valence    | T1domin      | T1happy      | T1sad        | T1angry | K           | K_ver       | K_vis | corRT |
|-------------|--------------|--------------|--------------|--------------|--------------|-------------|--------------|--------------|--------------|--------------|---------|-------------|-------------|-------|-------|
| MADRS       | -0.14        |              |              |              |              |             |              |              |              |              |         |             |             |       |       |
| RRS         | -0.17        | <b>0.69</b>  |              |              |              |             |              |              |              |              |         |             |             |       |       |
| ARS         | 0.05         | <b>0.34</b>  | <b>0.51</b>  |              |              |             |              |              |              |              |         |             |             |       |       |
| T1rum       | -0.13        | <b>0.55</b>  | <b>0.60</b>  | <b>0.39</b>  |              |             |              |              |              |              |         |             |             |       |       |
| T1arousal   | 0.08         | -0.20        | -0.04        | 0.16         | 0.01         |             |              |              |              |              |         |             |             |       |       |
| T1valence   | <b>0.30</b>  | <b>-0.50</b> | <b>-0.43</b> | <b>-0.25</b> | <b>-0.53</b> | 0.19        |              |              |              |              |         |             |             |       |       |
| T1dominance | -0.01        | <b>-0.44</b> | <b>-0.33</b> | -0.01        | <b>-0.27</b> | <b>0.31</b> | <b>0.39</b>  |              |              |              |         |             |             |       |       |
| T1happy     | <b>0.35</b>  | <b>-0.56</b> | <b>-0.47</b> | -0.24        | <b>-0.55</b> | 0.08        | <b>0.61</b>  | <b>0.26</b>  |              |              |         |             |             |       |       |
| T1sad       | <b>-0.26</b> | <b>0.56</b>  | <b>0.65</b>  | <b>0.33</b>  | <b>0.63</b>  | -0.06       | <b>-0.73</b> | <b>-0.31</b> | <b>-0.66</b> |              |         |             |             |       |       |
| T1angry     | 0.05         | 0.09         | -0.01        | 0.17         | 0.23         | 0.18        | <b>-0.34</b> | 0.19         | <b>-0.27</b> | <b>0.36</b>  |         |             |             |       |       |
| K           | 0.04         | 0.07         | -0.04        | -0.13        | -0.19        | -0.01       | 0.01         | -0.05        | -0.07        | -0.07        | -0.14   |             |             |       |       |
| K_ver       | -0.07        | 0.04         | -0.05        | -0.10        | -0.20        | -0.05       | -0.09        | -0.08        | -0.09        | 0.04         | -0.09   | <b>0.86</b> |             |       |       |
| K_vis       | 0.16         | 0.10         | 0.03         | -0.06        | -0.09        | 0.10        | 0.13         | -0.01        | -0.03        | -0.16        | -0.20   | <b>0.73</b> | <b>0.31</b> |       |       |
| corRT       | <b>0.31</b>  | 0.05         | 0.08         | 0.11         | 0.02         | -0.22       | 0.04         | -0.17        | 0.09         | -0.03        | -0.23   | -0.13       | -0.19       | 0.02  |       |
| RumResp     | 0.03         | <b>-0.50</b> | <b>-0.42</b> | -0.21        | <b>-0.62</b> | -0.06       | <b>0.48</b>  | 0.25         | <b>0.40</b>  | <b>-0.54</b> | -0.14   | 0.17        | 0.18        | 0.09  | 0.01  |

Notes. **Bold** indicates statistically a significant correlation with  $p < .05$ . RumResp – experimental induction related ruminative responsiveness (T2 rumination minus T1 rumination).

**Table S2.** Bayesian mixed model outcomes

| Effects                  | Standardized estimate | SE   | 95% interval (lower bound) | 95% interval (upper bound) | R-hat | Bulk ESS | Tail ESS |
|--------------------------|-----------------------|------|----------------------------|----------------------------|-------|----------|----------|
| Intercept                | 0.53                  | 0.22 | 0.09                       | 0.96                       | 1     | 2989     | 2717     |
| CT vs rumination         | -0.51                 | 0.25 | -1.01                      | -0.03                      | 1     | 2625     | 2788     |
| Sad vs Angry             | 0.1                   | 0.21 | -0.31                      | 0.51                       | 1     | 2696     | 2370     |
| Metacognition            | 0.11                  | 0.09 | -0.07                      | 0.29                       | 1     | 2793     | 2615     |
| Modality (Visual)        | -1.09                 | 0.13 | -1.34                      | -0.83                      | 1     | 6049     | 2591     |
| Depression               | 0.05                  | 0.09 | -0.13                      | 0.24                       | 1     | 2538     | 2213     |
| Induction responsiveness | 0.02                  | 0.24 | -0.46                      | 0.49                       | 1     | 2741     | 2386     |

Notes. Family: Gaussian, Identity links: mu and sigma, draws: 4 chains with 2000 iterations, warmup = 1000, total post-warmup draws = 4000. Random effect variable: Subject. Model convergence and reliability: It is recommended running at least four chains and only using the sample if R-hat is less than 1.05. Here, all R-hats were less than 1.05, which indicates a good convergence. Bulk-ESS and tail-ESS should be at least 100 (per Markov Chain) in order to be reliable and indicate that estimates of respective posterior quantiles are reliable. Here, all Bulk Effective Sample Size and Tail Effective Sample Size indices were above 100, which indicates good reliability.

## Likelihood tests

*Table S2A.* What is the likelihood of the null-effect of rumination on WM capacity?

| Hypothesis | Estimate | Est.Error | CI.Lower | CI.Upper | Evid.Ratio  | Post.Prob | Star |
|------------|----------|-----------|----------|----------|-------------|-----------|------|
| Effect = 0 | -0.5     | 0.25      | -1       | 0.01     | <b>0.58</b> | 0.37      |      |

*Table S2B.* What is the likelihood of the enhancement effect of rumination on WM capacity (negative estimate)?

| Hypothesis | Estimate | Est.Error | CI.Lower | CI.Upper | Evid.Ratio   | Post.Prob | Star |
|------------|----------|-----------|----------|----------|--------------|-----------|------|
| Effect < 0 | -0.5     | 0.25      | -0.91    | -0.07    | <b>35.04</b> | 0.97      | *    |

*Table S2C.* What is the likelihood of the impairment effect of rumination on WM capacity (positive estimate)?

| Hypothesis | Estimate | Est.Error | CI.Lower | CI.Upper | Evid.Ratio  | Post.Prob | Star |
|------------|----------|-----------|----------|----------|-------------|-----------|------|
| Effect > 0 | -0.5     | 0.25      | -0.91    | -0.07    | <b>0.03</b> | 0.03      |      |

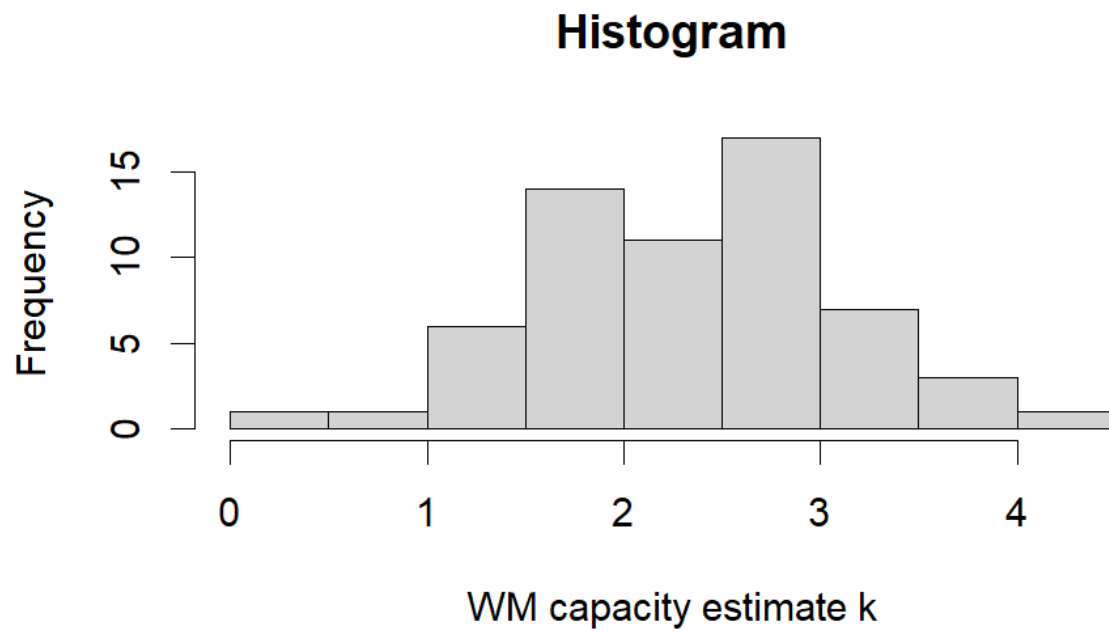

**Figure S1.** Distribution of the working memory capacity estimate ( $k$ ),  $n=61$

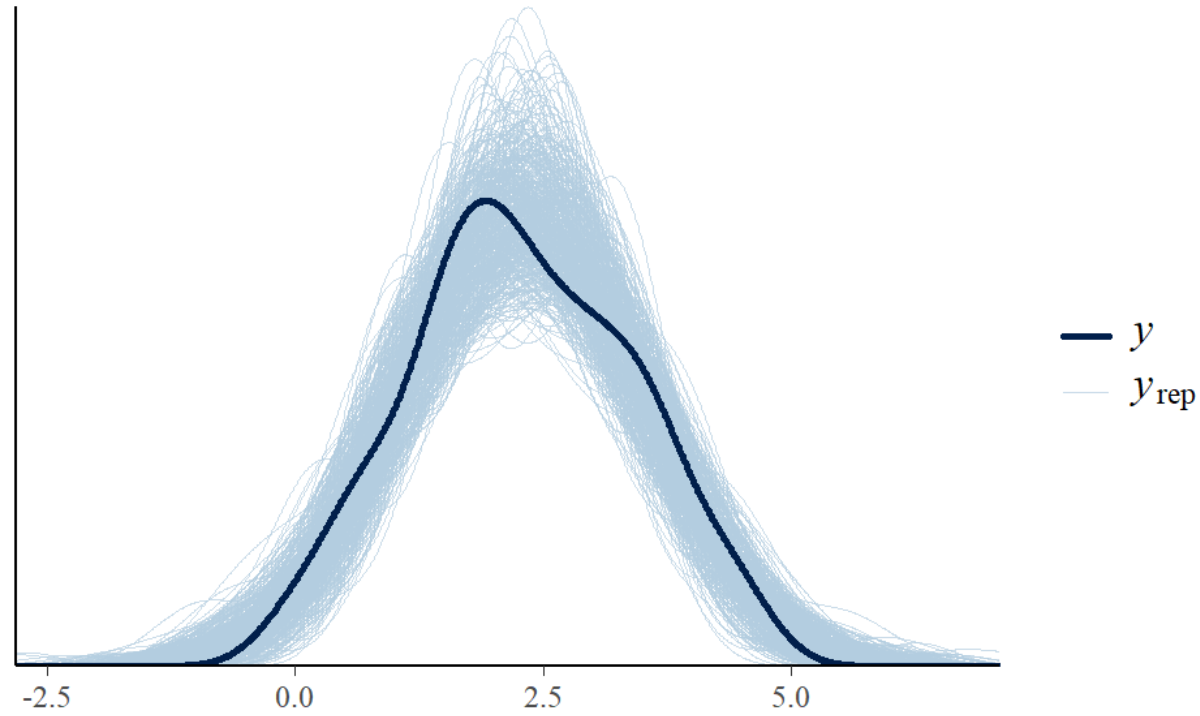

**Figure S2.** Posterior distribution check for the Bayesian prediction model for  $k$  with 500 posterior draws

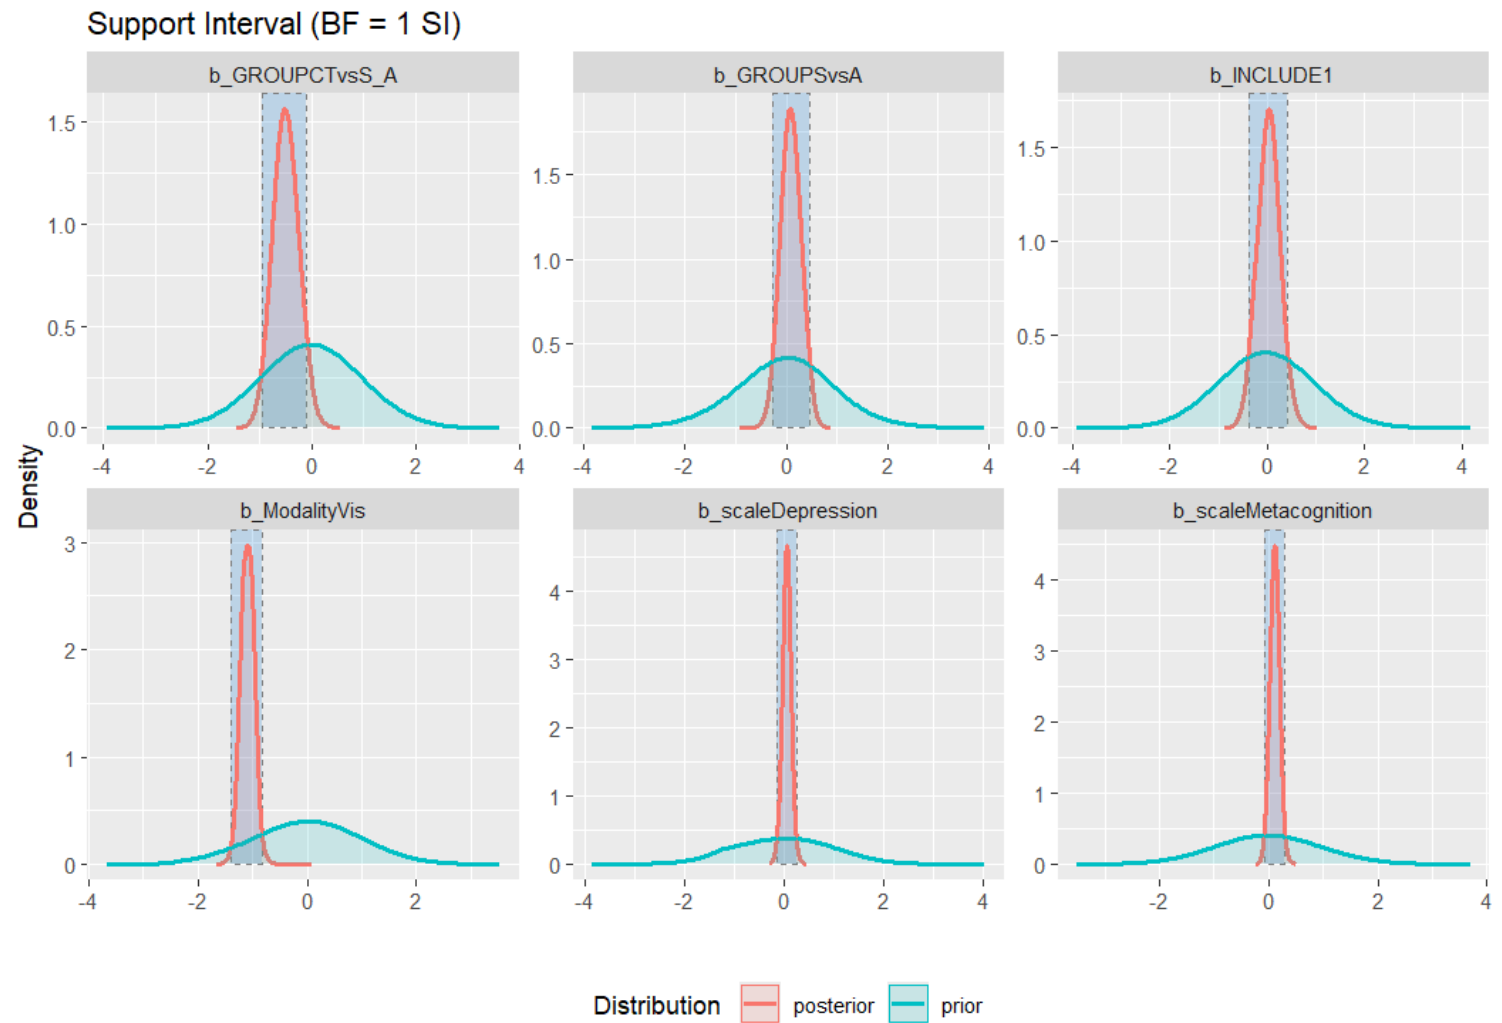

**Figure S3.** Prior and posterior distributions of the fixed effect coefficients

Notes. GROUPSvsA is a contrast for sad vs angry comparison. GROUPCTvsS\_A is a contrast for control vs rumination comparison, INCLUDE refers to the rumination induction responsiveness coded as 1 = responsive and 0 = nonresponsive.

Prior quality was checked with the `check_prior()` from `brms` package with the „gelman“ method in a model in which draws from priors were not drawn additionally to the posterior draws. This resulted in the following quality estimates (as recommended by Gelman et al. 2017), suggesting that the priors for the key variables were informative:

| Parameter       | Prior_Quality      |
|-----------------|--------------------|
| b_Intercept     | <b>informative</b> |
| b_GROUPCTvsS_A  | <b>informative</b> |
| b_GROUPSvsA     | <b>informative</b> |
| b_Metacognition | uninformative      |
| b_ModalityVis   | <b>informative</b> |
| b_Depression    | uninformative      |
| b_INCLUDE       | <b>informative</b> |

For an additional robustness check, and to consider the flat default distribution, we tested the same model with flat uninformative priors. This did not affect the key findings.
